1

1 Title: Patterns of West Nile virus in the Northeastern United States using negative binomial and  
2 mechanistic trait-based models

3

4 Author: Alexander C. Keyel<sup>1,2</sup>

5 ORCIDs: ACK: 0000-0001-5256-6274

6 <sup>1</sup> Division of Infectious Diseases, Wadsworth Center, New York State Department of Health, Albany, NY,  
7 United States of America

8 <sup>2</sup> Department of Atmospheric and Environmental Sciences, University at Albany, SUNY, Albany, NY,  
9 United States of America

10 Contact information (ACK): [alexander.keyel@health.ny.gov](mailto:alexander.keyel@health.ny.gov)

11

12 **Abstract:** West Nile virus primarily infects birds and mosquitoes but has also caused over 2000 human  
13 deaths, and >50,000 reported human cases. Present-day West Nile virus risk was described for the  
14 Northeastern United States, using a negative binomial model. Changes in risk due to climate change  
15 were examined for the next decade using a temperature-trait model. West Nile virus risk was generally  
16 expected to increase over the next decade due to changes in temperature, but the changes in risk were  
17 generally small. Many, but not all, populous counties in the northeast are already near peak risk. Several  
18 years in a row of low case numbers is consistent with a negative binomial, and should not be interpreted  
19 as a change in disease dynamics. Public health budgets need to be prepared for the expected infrequent  
20 years with higher-than-average cases. Absence of reported cases from low-population counties is  
21 consistent with similar risk as nearby counties with cases.

22

23 Keywords: Arbovirus; vector-borne disease; negative binomial; temperature-trait model; climate  
24 change; public health

25 **Introduction:** Climate change is predicted to adversely affect human health and economic productivity  
26 (USGCRP, 2018, p. 18). One way climate change is expected to affect human health is through changes  
27 to patterns of infectious disease (e.g., Ryan et al., 2015). West Nile virus (WNV) is a vector-borne disease  
28 of public health concern (Hayes et al., 2005; Keyel, Gorris, et al., 2021) and is expected to change its  
29 distribution due to climate change (Chen et al., 2013; Hoover & Barker, 2016; Keyel, Raghavendra, et al.,  
30 2021). Broadly, WNV is expected to shift northward, but regional temperature-based analyses show that  
31 changes may vary depending on regional differences in temperature (Keyel, Raghavendra, et al., 2021;  
32 Morin & Comrie, 2013). For most of the Northeast, temperatures are predicted to warm, especially  
33 minimum (night-time) temperatures (Liu et al., 2017). Precipitation is also predicted to increase,  
34 especially in winter, due in part to an increased number of storms (Lynch et al., 2016; Thibeault & Seth,  
35 2014). Summers may see increased run-off and periods of dryness (Lynch et al., 2016). In the next ten  
36 years, the climate is expected to warm by 0.2 – 0.5 °C (Liu et al., 2017). These predicted changes are  
37 within the range of variation in temperature currently experienced (Fig. 1).

38  
39 Probabilistic null models have been previously developed for the United States (Keyel et al.,  
40 unpublished). These models consider a range of possible outcomes, rather than predicting one single  
41 number of cases for the future. In one instance, a model that worked well in a non-probabilistic context  
42 (e.g., Keyel et al., 2019) was not able to outperform a probabilistic negative binomial null model in a  
43 predictive context. As a consequence, current models for the Northeastern US are very good at  
44 describing the range of possible outcomes, but do not provide much information on where in the range  
45 of outcomes a particular year will fall.

46

47 The goal of this manuscript was to apply the probabilistic null models to gain useful insights into  
48 patterns of West Nile virus, and compare them to short-range climate change predictions with an aim of  
49 identifying short-term adaptation measures that can be taken.

50

## 51 **Methods**

### 52 **Negative binomial model**

53 Negative binomial model predictions were taken from Keyel et al. (Keyel et al., unpublished), as that was  
54 found to be among the strongest null models in the Northeast. The negative binomial was chosen  
55 instead of the historical null model due to the long time series, and the capacity to downscale model  
56 results based on population (Klenke, 2008). The model used here was implemented in R (R Core Team,  
57 2017). This distribution allowed us to cleanly calculate probability of an arbitrary number of human  
58 neuroinvasive cases for an arbitrary number of years into the future. While this model does not identify  
59 a good year vs. a bad year, it can give insights into the overall probability of a bad year for WNV.

60

61 A negative binomial was fit to each county individually, and to groups of multiple counties (Figure S1).  
62 Group assignment was subjective and followed the following guidelines: Each group needed to be  
63 contiguous with surrounding counties, contain counties from only one state, and include a minimum of  
64 600,000 people in each group. No upper group size was imposed, but groups with more than 1,200,000  
65 were examined to see if they could be split into two or more groups. Secondly, counties with similar  
66 population density were preferentially grouped together. The probability a county would have zero  
67 West Nile virus cases by chance was calculated, assuming the down-scaled group negative binomial  
68 distribution was true.

69

70 Neuroinvasive case data are available from the Centers for Disease Control ArboNET (CDC, 2019), and R  
71 code is available from a public repository (software citation pending). Maps were created using ArcGIS  
72 10.6.1 (Redlands, CA) with 2017 US Census TIGER/Shapefiles as the county base layer (US Census  
73 Bureau, 2021). Population data were derived from US Census data (US Census Bureau, 2017, 2019).

74

### 75 **Climate change predictions**

76 Mosquito-temperature-trait models have been productively used to understand vector-borne diseases  
77 (Mordecai et al., 2019). They were recently adapted to WNV (Shocket et al., 2020). It was previously  
78 found that statistical models trained on human cases that included an adequate temperature range  
79 largely supported the results of mosquito-trait-based models for West Nile virus in New York and  
80 Connecticut (Keyel, Raghavendra, et al., 2021). This manuscript builds upon this prior work by expanding  
81 the use of the mosquito temperature-trait models to the entire northeast. Briefly, these models use  
82 mosquito life history traits to estimate a relative  $R_0$  for mosquito risk based on temperature. Traits are  
83 combined in a multiplicative framework (see Eqn 1, modified from (Shocket et al., 2020), see (Keyel,  
84 Raghavendra, et al., 2021) for details), then scaled to give an index of risk between 0 and 1.

85

$$86 \quad R_0(T) = \sqrt{a(T)^3 * vc(T) * e^{\frac{-u(T)}{PDR(T)}} * EFGC(T) * EV(T) * pLA(T) * MDR(T) * u(T)^{-3}} \quad (\text{Eqn 1})$$

87

88 Host density and disease duration were assumed to be constant (but see Kilpatrick et al., 2006 for the  
89 potential for host heterogeneity to affect these results). Critically, these models look at the contribution  
90 of temperature only to risk, other important factors such as breeding habitat availability, land cover  
91 (Bradley et al., 2008), or precipitation are not considered (Shocket et al., 2020). Please note that these  
92 models were developed in the context of *Culex pipiens*, and therefore predicted risk will likely be  
93 different for different mosquito species (Shocket et al., 2020). However, *Cx. pipiens* is one of the most

94 important mosquito vectors across the Northeastern US (Andreadis, 2012; Kilpatrick et al., 2005;  
95 Simpson et al., 2012; Turell et al., 2005). Present day conditions and risk expected for 0.5 °C warming  
96 were examined. Present-day July – September mean temperatures were derived from gridMET  
97 (Abatzoglou, 2013), using the GridMET downloader tool (Wimberly & Davis, 2019) and averaged over  
98 the entire period. Model results up to 4°C warming were generated and are available (data citation  
99 pending). Up to 4°C warming for the 5 most densely populated counties in the Northeast was also  
100 examined (Table 1). Warming of up to 4°C is within the realm of possible temperature changes for the  
101 Northeast by the end of the century (IPCC, 2014; Liu et al., 2017). This is also the rationale for 0.5°C for  
102 an upper-bound for the increase in temperature in the next decade ( $4^{\circ}\text{C} / 8 \text{ decades} = 0.5^{\circ}\text{C}$  per  
103 decade). Note that the analyses here calculated trait-based risk on mean temperatures for the region.  
104 Due to the non-linear response curve, the quantitative results would have differed if relative risk were  
105 calculated first, and then averaged. A second source of error for this approach is microclimatic  
106 variability, which can affect disease risk (Haider et al., 2017). Future research could refine these results,  
107 but the broad patterns are expected to be qualitatively similar.

108

## 109 **Results**

110 Most counties (374 of 433) in the study region had a low probability (<20% chance) of having a single  
111 WNV neuroinvasive case in the next year (Fig. 2a). More than three times more counties had a high risk  
112 of having at least one neuroinvasive case (>60% chance) in a five-year time frame (63, Fig. 2b) compared  
113 to a 1-year timeframe (17 of 433, Fig. 2a). Relatively few counties (10 of 433) had a high probability  
114 (>60% chance) of having a year with at least 5 neuroinvasive cases within a 5-year timeframe, and these  
115 were predominantly urban areas with high populations (Fig. 2c). Two groups, containing 40 counties,  
116 never had a single case of WNV. For the remaining groups with WNV cases, counties with no observed  
117 cases were predicted to have a low probability of cases based on the group model. Only one county

118 (Washington, PA) had a <0.05 probability of having 20 years of no cases by chance assuming a similar  
119 risk to the rest of the counties in the group. When corrected for multiple comparisons, no county  
120 differed significantly from the negative binomial model (with 174 comparisons, ~8-9 counties would be  
121 expected to have a p value <0.05 by chance).

122

123 When risk was divided up into 5 equal intervals, 223 counties had the highest temperature-based risk  
124 for WNV, while 14 were in the lowest risk category (Fig. 3a). Most counties (84%, 365 of 433) were  
125 predicted to increase in temperature-based risk over the next decade (Fig. 3b).

126

127 The five most densely populated urban areas are expected to remain in a suitable temperature range for  
128 WNV under future warming (Table 1). Once 0.5 °C of warming has occurred, 4 of the 5 urban areas will  
129 decrease in risk with further warming. However, substantial reductions in risk for many major urban  
130 areas will not occur with less than 2.5 °C of warming.

131

## 132 **Discussion**

133 A negative binomial distribution does a very good job of describing patterns of WNV in the northeast  
134 (Keyel et al., unpublished). The most important insight for public health is that a series of years with no  
135 or few WNV cases is possible even with a constant WNV risk. This means that reducing public health  
136 expenditures based on a few years with low WNV, on the assumption that it 'has gone away' is a poor  
137 strategy and will leave public health unprepared for the expected high years. WNV budgets should  
138 consider WNV risk over at least 5-year time horizons and have an emergency fund or the capacity to roll  
139 over funds from one year to the next, in order to address the expected high WNV years.

140

141 Further, areas with low rates of WNV may want to adopt a regional response approach that ensures  
142 counties have access to resources when cases occur. For most of the Northeast, a previous absence of a  
143 neuroinvasive WNV case over the past 20 years is not an indicator that the county will remain free of  
144 neuroinvasive WNV cases in the future, or even is lower risk than counties that have previously had  
145 cases. This suggests that these counties do not have some special protecting factors, but simply did not  
146 have cases due to low populations and random chance. The exceptions to this are in most of Maine (Fig.  
147 2) and southwestern Virginia, where no cases have been reported. Both of these areas are predicted to  
148 have increased risk in the next decade due to climate change (Fig. 3). This is likely to be more relevant  
149 for Maine than Virginia, as current temperature-based risk is relatively low in Maine. In Virginia,  
150 temperature-based risk is already high, suggesting some other factor is responsible for the reduced  
151 number of cases. Therefore, southwestern Virginia may not see an increase in number of cases due to  
152 warming.

153

154 In the long-run, WNV risk is expected to increase across most of the Northeast, with the largest  
155 increases predicted in areas with relatively low present-day risk. Decreases in risk are predicted for the  
156 southern portion of the region. Locations where West Nile virus is relatively rare will need to be on the  
157 look-out for an increase in cases (Fig. 3b). These counties can expect to see substantial increases in  
158 temperature-based risk in the coming decades. Some of these regions should prepare to begin  
159 surveillance programs, doctors should familiarize themselves with WNV symptoms and lab work, and  
160 mosquito control operations should be prepared for expanded operations to reduce disease risk. That  
161 said, temperature-based risk is currently high in some localities that have low observed WNV risk, and  
162 therefore other factors may also be critical in determining how WNV risk may change into the future.

163

164 Locations with the most WNV cases in the present will have relatively little to do for long-term climate-  
165 change-related planning for West Nile virus. Existing mitigation measures should be as effective or more  
166 effective at controlling West Nile virus in the future, as conditions shift to be less suitable for mosquito-  
167 based transmission of West Nile virus. An important caveat is this research was purely from the  
168 standpoint of WNV. In locations where WNV is expected to decline, other vector-borne diseases, such as  
169 Zika virus may expand (Ryan et al., 2021). However, warming is not predicted to be sufficient to be  
170 suitable for dengue to become endemic in the Northeast under future climate change scenarios that  
171 extend out to 2080 (Messina et al., 2019).

172

173 The mismatch between probabilistic present-day risk compared to temperature-trait-based risk for the  
174 Northeast is interesting (compare Fig. 2b and Fig. 3a). Virginia and West Virginia are lower risk than  
175 expected based on the temperature models, while western and central Pennsylvania appears to be  
176 higher risk than predicted by the temperature models. Future work can explore whether landcover can  
177 explain these discrepancies, as prior research has suggested that urban areas are more favorable to  
178 WNV amplification (Bradley et al., 2008).

179

180 Another interesting future direction would be to compare probabilistic risk with present-day  
181 surveillance effort. Are some regions under-surveyed for vector-borne diseases? Could additional  
182 surveillance reduce human cases in these regions? Do some areas with high surveillance have fewer  
183 cases than predicted? Are they over-surveyed, or does the enhanced surveillance lead to fewer cases?

184

185 **Acknowledgements:** I thank A. Tyre for statistical assistance and O. Elison Timm for feedback on an  
186 earlier draft of the manuscript. I thank S. Mathis and the Centers for Disease Control for access to the  
187 CDC neuroinvasive data. This publication was supported by cooperative agreement 1U01CK000509-01,



188 funded by the Centers for Disease Control and Prevention and by the National Institutes of Health grant  
189 R01AI168097. Its contents are solely the responsibility of the author and do not necessarily represent  
190 the official views of the Centers for Disease Control and Prevention or the Department of Health and  
191 Human Services.

192

193 **Literature Cited**

194 Abatzoglou, J. T. (2013). Development of gridded surface meteorological data for ecological applications  
195 and modelling. *International Journal of Climatology*, *33*(1), 121–131.

196 Andreadis, T. G. (2012). The contribution of *Culex pipiens* complex mosquitoes to transmission and  
197 persistence of West Nile virus in North America. *Journal of the American Mosquito Control*  
198 *Association*, *28*(4s), 137–151.

199 Bradley, C. A., Gibbs, S. E. J., & Altizer, S. (2008). Urban Land Use Predicts West Nile Virus Exposure in  
200 Songbirds. *Ecological Applications*, *18*(5), 1083–1092. <https://doi.org/10.1890/07-0822.1>

201 CDC. (2019). Nationally notifiable arboviral diseases reported to ArboNET: Data release guidelines.  
202 Centers for Disease Control and Prevention.

203 Chen, C. C., Jenkins, E., Epp, T., Waldner, C., Curry, P. S., & Soos, C. (2013). Climate change and West Nile  
204 virus in a highly endemic region of North America. *International Journal of Environmental*  
205 *Research and Public Health*, *10*(7), 3052–3071.

206 Haider, N., Kirkeby, C., Kristensen, B., Kjaer, L. J., Sorensen, J. H., & Bodker, R. (2017). Microclimatic  
207 temperatures increase the potential for vector-borne disease transmission in the Scandinavian  
208 climate. *Scientific Reports*, *7*, 8175. <https://doi.org/10.1038/s41598-017-08514-9>

209 Hayes, E. B., Sejvar, J. J., Zaki, S. R., Lanciotti, R. S., Bode, A. V., & Campbell, G. L. (2005). Virology,  
210 pathology, and clinical manifestations of West Nile virus disease. *Emerging Infectious Diseases*,  
211 *11*(8), 1174.

- 212 Hoover, K. C., & Barker, C. M. (2016). West Nile virus, climate change, and circumpolar vulnerability.  
213 *Wiley Interdisciplinary Reviews: Climate Change*, 7(2), 283–300.
- 214 IPCC. (2014). Climate Change 2014: Synthesis Report. Contribution of Working Groups I, II and III to the  
215 Fifth Assessment Report of the Intergovernmental Panel on Climate Change [Core Writing Team,  
216 R.K. Pachauri and L.A. Meyer (eds.)]. IPCC, Geneva, Switzerland, 151 pp.
- 217 Keyel, A. C., Elison Timm, O., Backenson, P. B., Prussing, C., Quinones, S., McDonough, K. A., et al. (2019).  
218 Seasonal temperatures and hydrological conditions improve the prediction of West Nile virus  
219 infection rates in *Culex* mosquitoes and human case counts in New York and Connecticut. *PLOS*  
220 *ONE*, 14(6), e0217854. <https://doi.org/10.1371/journal.pone.0217854>
- 221 Keyel, A. C., Gorris, M. E., Rochlin, I., Uelmen, J. A., Chaves, L. F., Hamer, G. L., et al. (2021). A proposed  
222 framework for the development and qualitative evaluation of West Nile virus models and their  
223 application to local public health decision-making. *PLOS Neglected Tropical Diseases*, 15(9),  
224 e0009653. <https://doi.org/10.1371/journal.pntd.0009653>
- 225 Keyel, A. C., Raghavendra, A., Ciota, A. T., & Elison Timm, O. (2021). West Nile virus is predicted to be  
226 more geographically widespread in New York State and Connecticut under future climate  
227 change. *Global Change Biology*, 27(21), 5430–5445. <https://doi.org/10.1111/gcb.15842>
- 228 Keyel, A. C., Kilpatrick, A. M., & Chaves, L. F. (unpublished). Probabilistic Evaluation of Null Models for  
229 West Nile Virus in the United States. *BioRxiv*.
- 230 Kilpatrick, A. M., Kramer, L. D., Campbell, S. R., Alleyne, E. O., Dobson, A. P., & Daszak, P. (2005). West  
231 Nile virus risk assessment and the bridge vector paradigm. *Emerging Infectious Diseases*, 11(3),  
232 425.
- 233 Kilpatrick, A. M., Daszak, P., Jones, M. J., Marra, P. P., & Kramer, L. D. (2006). Host heterogeneity  
234 dominates West Nile virus transmission. *Proceedings of the Royal Society of London B: Biological*  
235 *Sciences*, 273(1599), 2327–2333.

- 236 Klenke, A. (2008). *Probability Theory: A Comprehensive Course*. London: Springer-Verlag.
- 237 Liu, C., Ikeda, K., Rasmussen, R., Barlage, M., Newman, A. J., Prein, A. F., et al. (2017). Continental-scale  
238 convection-permitting modeling of the current and future climate of North America. *Climate*  
239 *Dynamics*, 49(1–2), 71–95.
- 240 Lynch, C., Seth, A., & Thibeault, J. (2016). Recent and Projected Annual Cycles of Temperature and  
241 Precipitation in the Northeast United States from CMIP5. *Journal of Climate*, 29(1), 347–365.  
242 <https://doi.org/10.1175/JCLI-D-14-00781.1>
- 243 Messina, J. P., Brady, O. J., Golding, N., Kraemer, M. U. G., Wint, G. R. W., Ray, S. E., et al. (2019). The  
244 current and future global distribution and population at risk of dengue. *Nature Microbiology*,  
245 4(9), 1508–1515. <https://doi.org/10.1038/s41564-019-0476-8>
- 246 Mordecai, E. A., Caldwell, J. M., Grossman, M. K., Lippi, C. A., Johnson, L. R., Neira, M., et al. (2019).  
247 Thermal biology of mosquito-borne disease. *Ecology Letters*, 22(10), 1690–1708.  
248 <https://doi.org/10.1111/ele.13335>
- 249 Morin, C. W., & Comrie, A. C. (2013). Regional and seasonal response of a West Nile virus vector to  
250 climate change. *Proceedings of the National Academy of Sciences*, 110(39), 15620–15625.
- 251 R Core Team. (2017). *R: A Language and Environment for Statistical Computing*. Vienna, Austria: R  
252 Foundation for Statistical Computing. Retrieved from <https://www.R-project.org/>
- 253 Ryan, S. J., McNally, A., Johnson, L. R., Mordecai, E. A., Ben-Horin, T., Paaijmans, K., & Lafferty, K. D.  
254 (2015). Mapping Physiological Suitability Limits for Malaria in Africa Under Climate Change.  
255 *Vector-Borne and Zoonotic Diseases*, 15(12), 718–725. <https://doi.org/10.1089/vbz.2015.1822>
- 256 Ryan, S. J., Carlson, C. J., Tesla, B., Bonds, M. H., Ngonghala, C. N., Mordecai, E. A., et al. (2021). Warming  
257 temperatures could expose more than 1.3 billion new people to Zika virus risk by 2050. *Global*  
258 *Change Biology*, 27(1), 84–93. <https://doi.org/10.1111/gcb.15384>

- 259 Shocket, M. S., Verwillow, A. B., Numazu, M. G., Slamani, H., Cohen, J. M., El Moustaid, F., et al. (2020).  
260 Transmission of West Nile and five other temperate mosquito-borne viruses peaks at  
261 temperatures between 23°C and 26°C. *ELife*, 9, e58511. <https://doi.org/10.7554/eLife.58511>
- 262 Simpson, J. E., Hurtado, P. J., Medlock, J., Molaei, G., Andreadis, T. G., Galvani, A. P., & Diuk-Wasser, M.  
263 A. (2012). Vector host-feeding preferences drive transmission of multi-host pathogens: West  
264 Nile virus as a model system. *Proceedings of the Royal Society of London B: Biological Sciences*,  
265 279, rspb20111282.
- 266 Thibeault, J. M., & Seth, A. (2014). Changing climate extremes in the Northeast United States:  
267 observations and projections from CMIP5. *Climatic Change*, 127(2), 273–287.
- 268 Turell, M. J., Dohm, D. J., Sardelis, M. R., O’guinn, M. L., Andreadis, T. G., & Blow, J. A. (2005). An Update  
269 on the Potential of North American Mosquitoes (Diptera: Culicidae) to Transmit West Nile Virus.  
270 *Journal of Medical Entomology*, 42(1), 57–62. <https://doi.org/10.1093/jmedent/42.1.57>
- 271 US Census Bureau. (2017). Intercensal estimates of the resident population for counties and states: April  
272 1, 2000 to July 1, 2010. Suitland, MD: US Census Bureau. Retrieved from:  
273 [https://www.census.gov/data/datasets/time-series/demo/popest/intercensal-2000-2010-](https://www.census.gov/data/datasets/time-series/demo/popest/intercensal-2000-2010-counties.html)  
274 [counties.html](https://www.census.gov/data/datasets/time-series/demo/popest/intercensal-2000-2010-counties.html).
- 275 US Census Bureau. (2019). Population, Population Change, and Estimated Components of Population  
276 Change: April 1, 2010 to July 1, 2019 (CO-EST2019-alldata). Suitland, MD: US Census Bureau.  
277 Retrieved from: [https://www.census.gov/data/tables/time-series/demo/popest/2010s-](https://www.census.gov/data/tables/time-series/demo/popest/2010s-counties-total.html)  
278 [counties-total.html](https://www.census.gov/data/tables/time-series/demo/popest/2010s-counties-total.html).
- 279 US Census Bureau. (2021). TIGER/Line Shapefiles. United States Census Bureau. Retrieved from  
280 <https://www.census.gov/geo/maps-data/data/tiger-line.html>
- 281 USGCRP. (2018). Chapter 18: Northeast. in Impacts, Risks, and Adaptation in the United States: Fourth  
282 National Climate Assessment, Volume II [Reidmiller, D.R., C.W. Avery, D.R. Easterling, K.E.

13

283 Kunkel, K.L.M. Lewis, T.K. Maycock, and B.C. Stewart (eds.)). U.S. Global Change Research  
284 Program, Washington, DC, USA, . Retrieved from <https://nca2018.globalchange.gov/chapter/18/>  
285 Wimberly, M. C., & Davis, J. K. (2019, February 8). GRIDMET\_downloader.js (Version 1.1). University of  
286 Oklahoma. Retrieved from <https://github.com/ecograph/arbomap>  
287  
288

289 **Table 1.** Relative  $R_0$ 's for 5 major northeastern US metropolitan counties based on different levels of  
290 warming (in C).

| County               | +0.0 | +0.5 | +1.0 | +1.5 | +2.0 | +2.5 | +3.0 | +3.5 | +4.0  |
|----------------------|------|------|------|------|------|------|------|------|-------|
| Suffolk (Boston)     | 0.88 | 0.92 | 0.96 | 0.99 | 1.00 | 1.00 | 0.98 | 0.96 | 0.92  |
| New York (Manhattan) | 1.00 | 1.00 | 0.98 | 0.95 | 0.91 | 0.86 | 0.80 | 0.73 | 0.66  |
| Philadelphia         | 1.00 | 1.00 | 0.99 | 0.96 | 0.92 | 0.88 | 0.82 | 0.75 | 0.68  |
| Baltimore City       | 0.98 | 0.95 | 0.91 | 0.86 | 0.80 | 0.74 | 0.66 | 0.58 | 0.50  |
| District of Columbia | 1.00 | 0.99 | 0.96 | 0.92 | 0.87 | 0.82 | 0.75 | 0.67 | 0.597 |

291

292

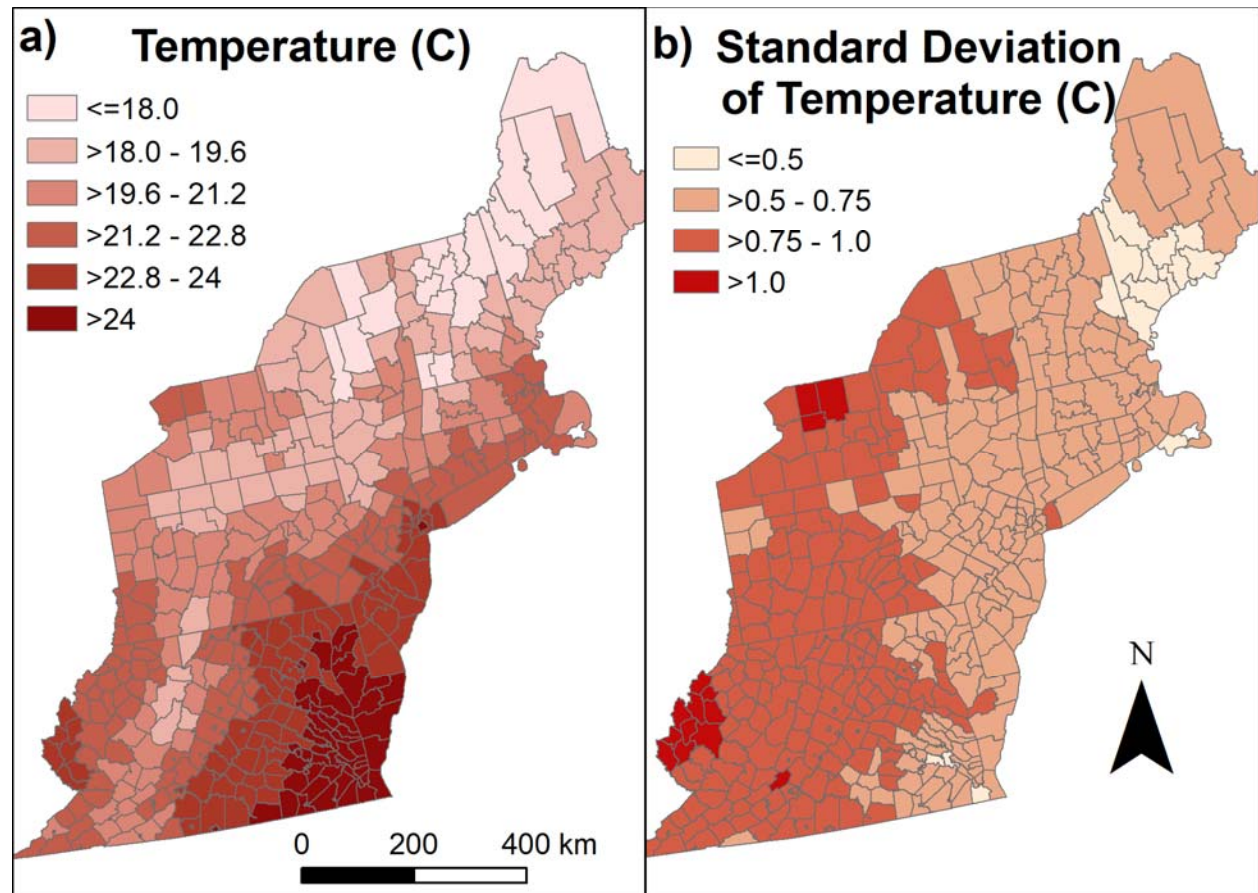

293  
294  
295  
296

**Fig. 1.** a) Present-day mean temperature for July - September, b) standard deviation of present-day temperature. Map base layer from 2017 TIGER/Shapefiles (US Census Bureau, 2021).

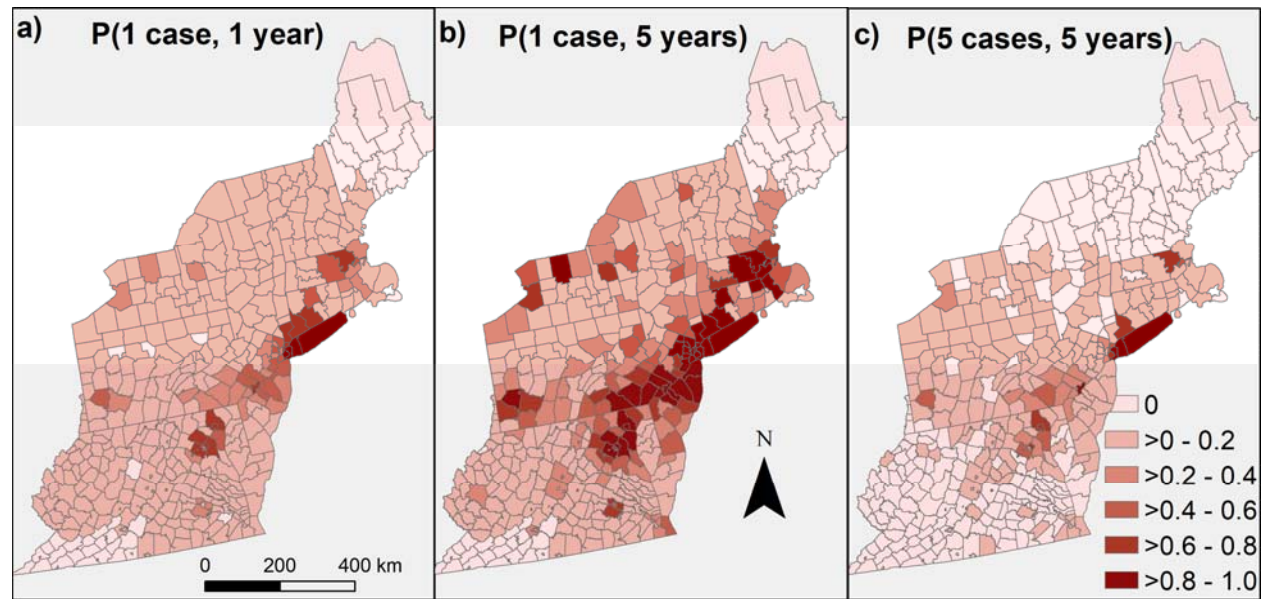

297  
298 **Fig. 2.** a) Probability of having one case of West Nile virus in the next year, b) probability of having at  
299 least one case of WNV in the next five years, and c) probability of having one year with at least 5 cases in  
300 the next five years. The negative binomial model was fit based on historical cases. Counties with less  
301 than 600,000 people were merged with other contiguous counties in the same state until at least a  
302 600,000 person threshold was reached, to ensure a sufficient population size to detect WNV at low  
303 incidence. Results were then downscaled back to the county level. Underlying spatial data from 2017  
304 TIGER/Shapefiles from US Census bureau (US Census Bureau, 2021).  
305



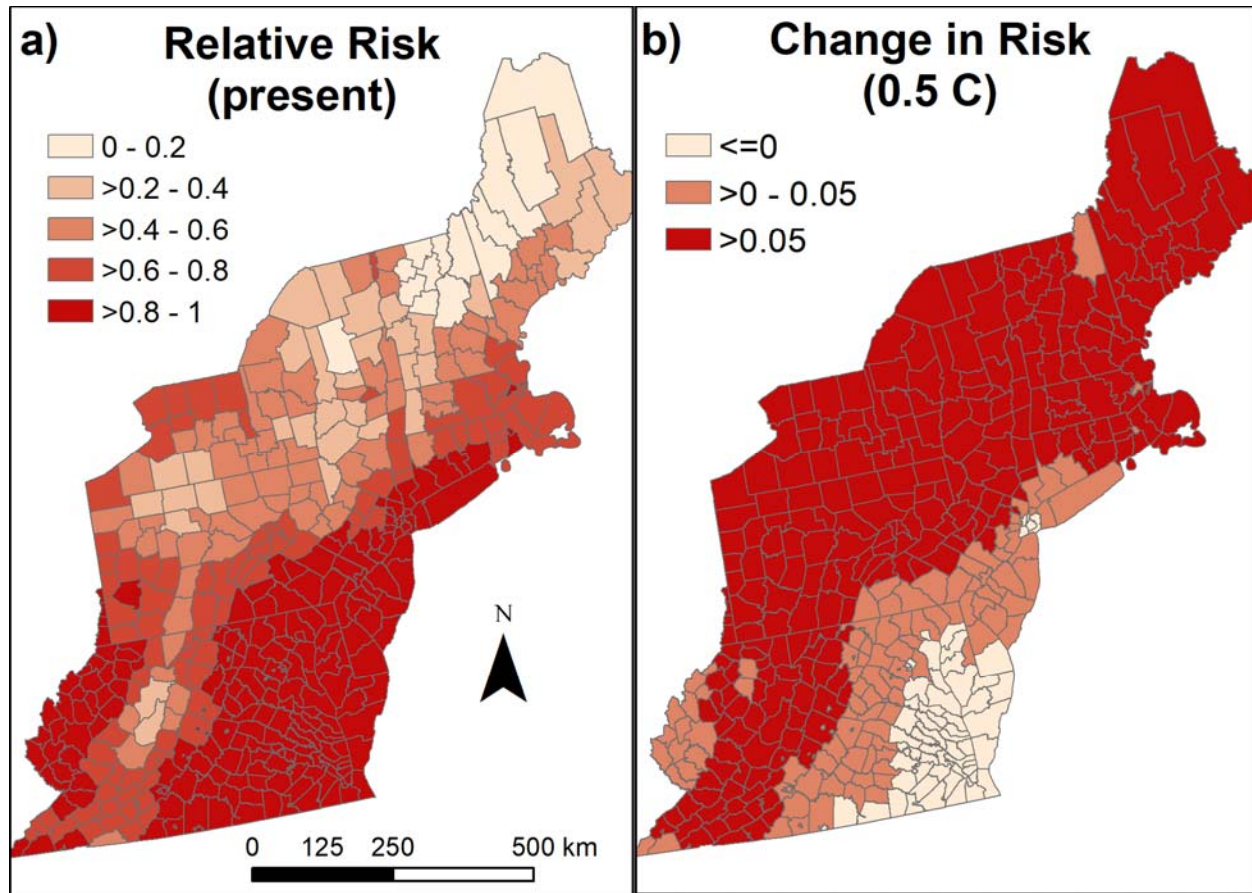

306

307 **Fig. 3** a) present-day temperature-trait-predicted relative risk for *Culex pipiens*, and b) the predicted  
308 change in temperature-based risk with 0.5 °C warming (on the high end for predicted for warming in the  
309 next decade). Note that this amount of warming falls within the range of present day temperature  
310 variation around the mean presented in (a). Map base layer from 2017 TIGER/Shapefiles (US Census  
311 Bureau, 2021).

312

313

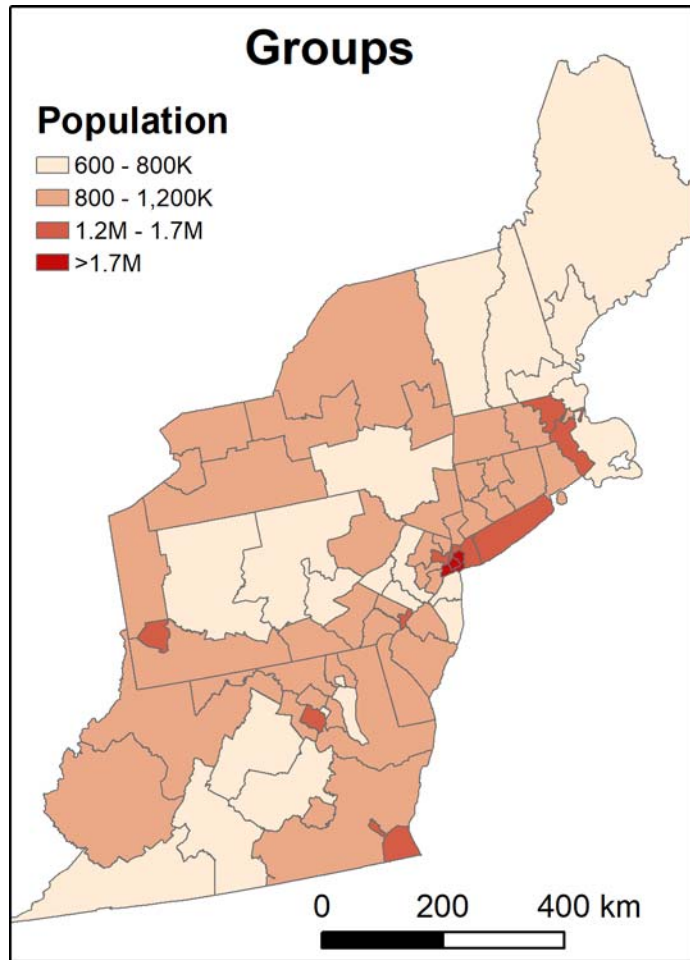

314

315 **Figure S1.** Map of population by groups used to fit the negative binomial model. Group assignment

316 included a subjective element, and results for individual counties could vary depending on group

317 assignment. Groups derived from merging 2017 TIGER/Shapefiles (US Census Bureau, 2021).
